# Supplementary material
Source: Springer Nature journal article supplement (https://www.springermedizin.de/resource/supplementary/12936_2007_478_MOESM5_ESM.pdf/9548134)

vehicle

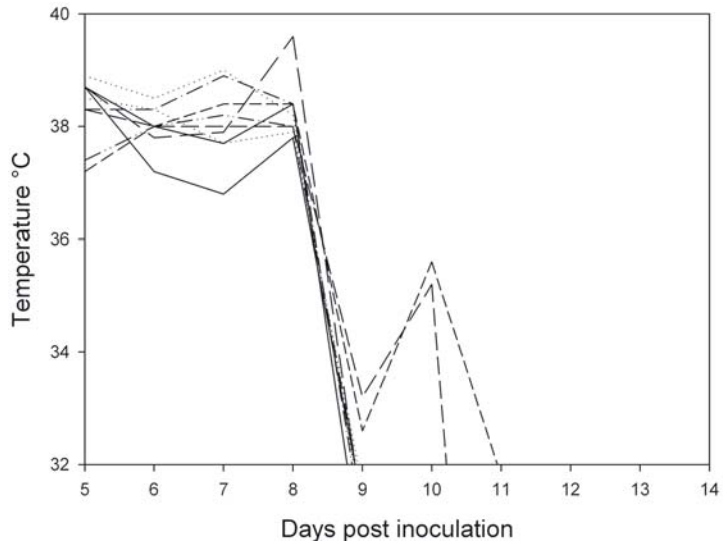

rhEpo 200U Day 4-7

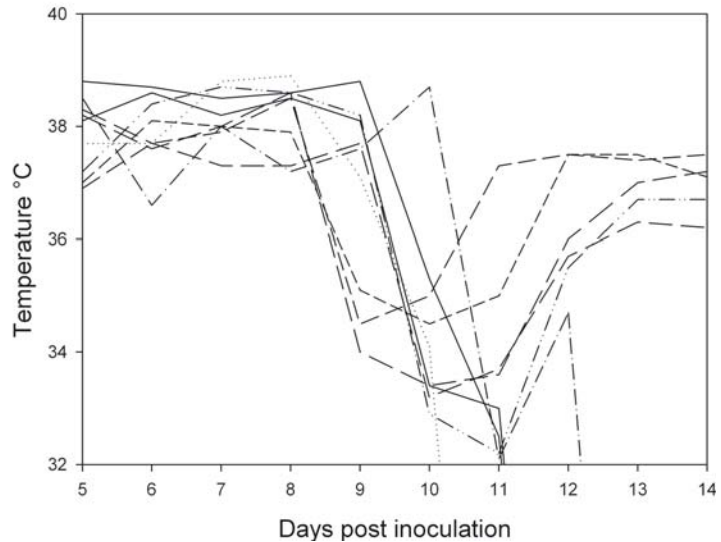

Supplement: MOESM5 [file 9548134]
